# Supplementary material
Source: PubMed Central journal article supplement (PMC3729433)
Supplement: NIHMS370653-supplement-supplement_1.pdf [file NIHMS370653-supplement-supplement_1.pdf]

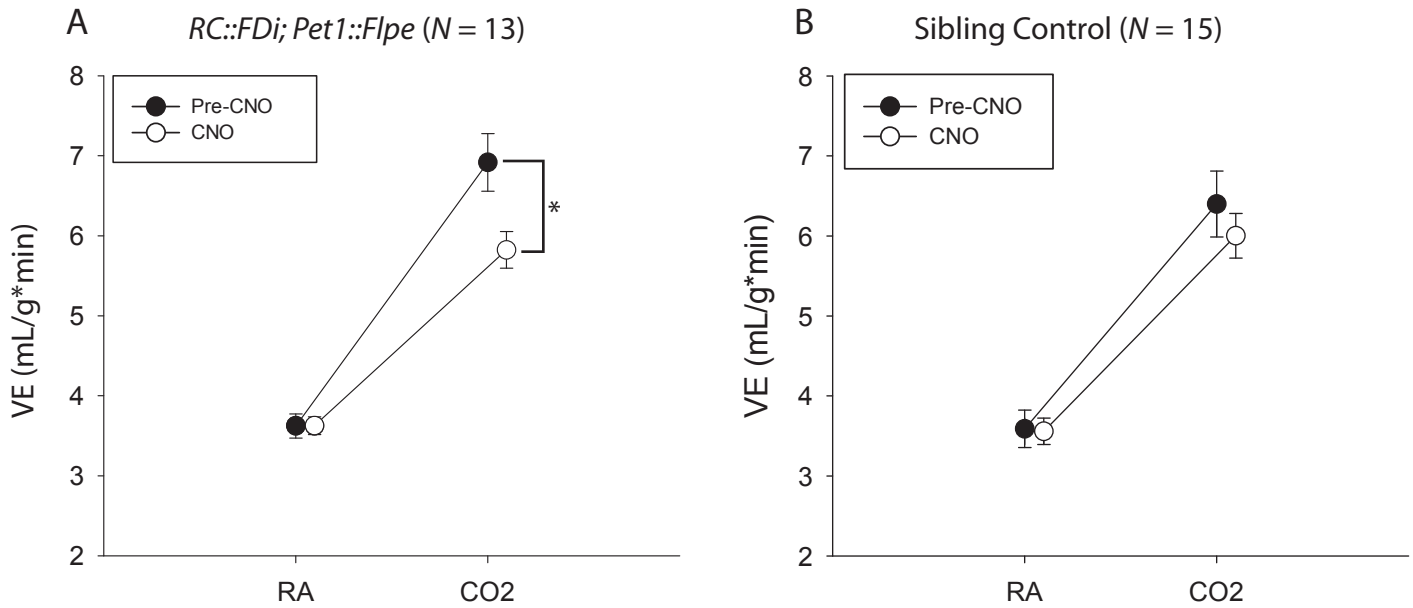

Sup. Fig. 1. CNO/Di-inhibition of *Pet1::Flpe*-defined serotonergic neurons disrupts the central respiratory CO<sub>2</sub> chemoreflex in conscious adult mice. Double transgenic *RC::FDi; Pet1::Flpe* mice were assessed as in Fig. 3. with plethysmograph chamber temperature held at 34°C. (A) *RC::FDi; Pet1::Flpe* showed reduced hypercapnic ventilatory responses after administration of CNO (10 mg/kg), \*p = 0.001 (RM ANOVA followed by Tukey post-hoc). (B) Sibling controls. CNO administered trials shifted slightly to the right for clarity.

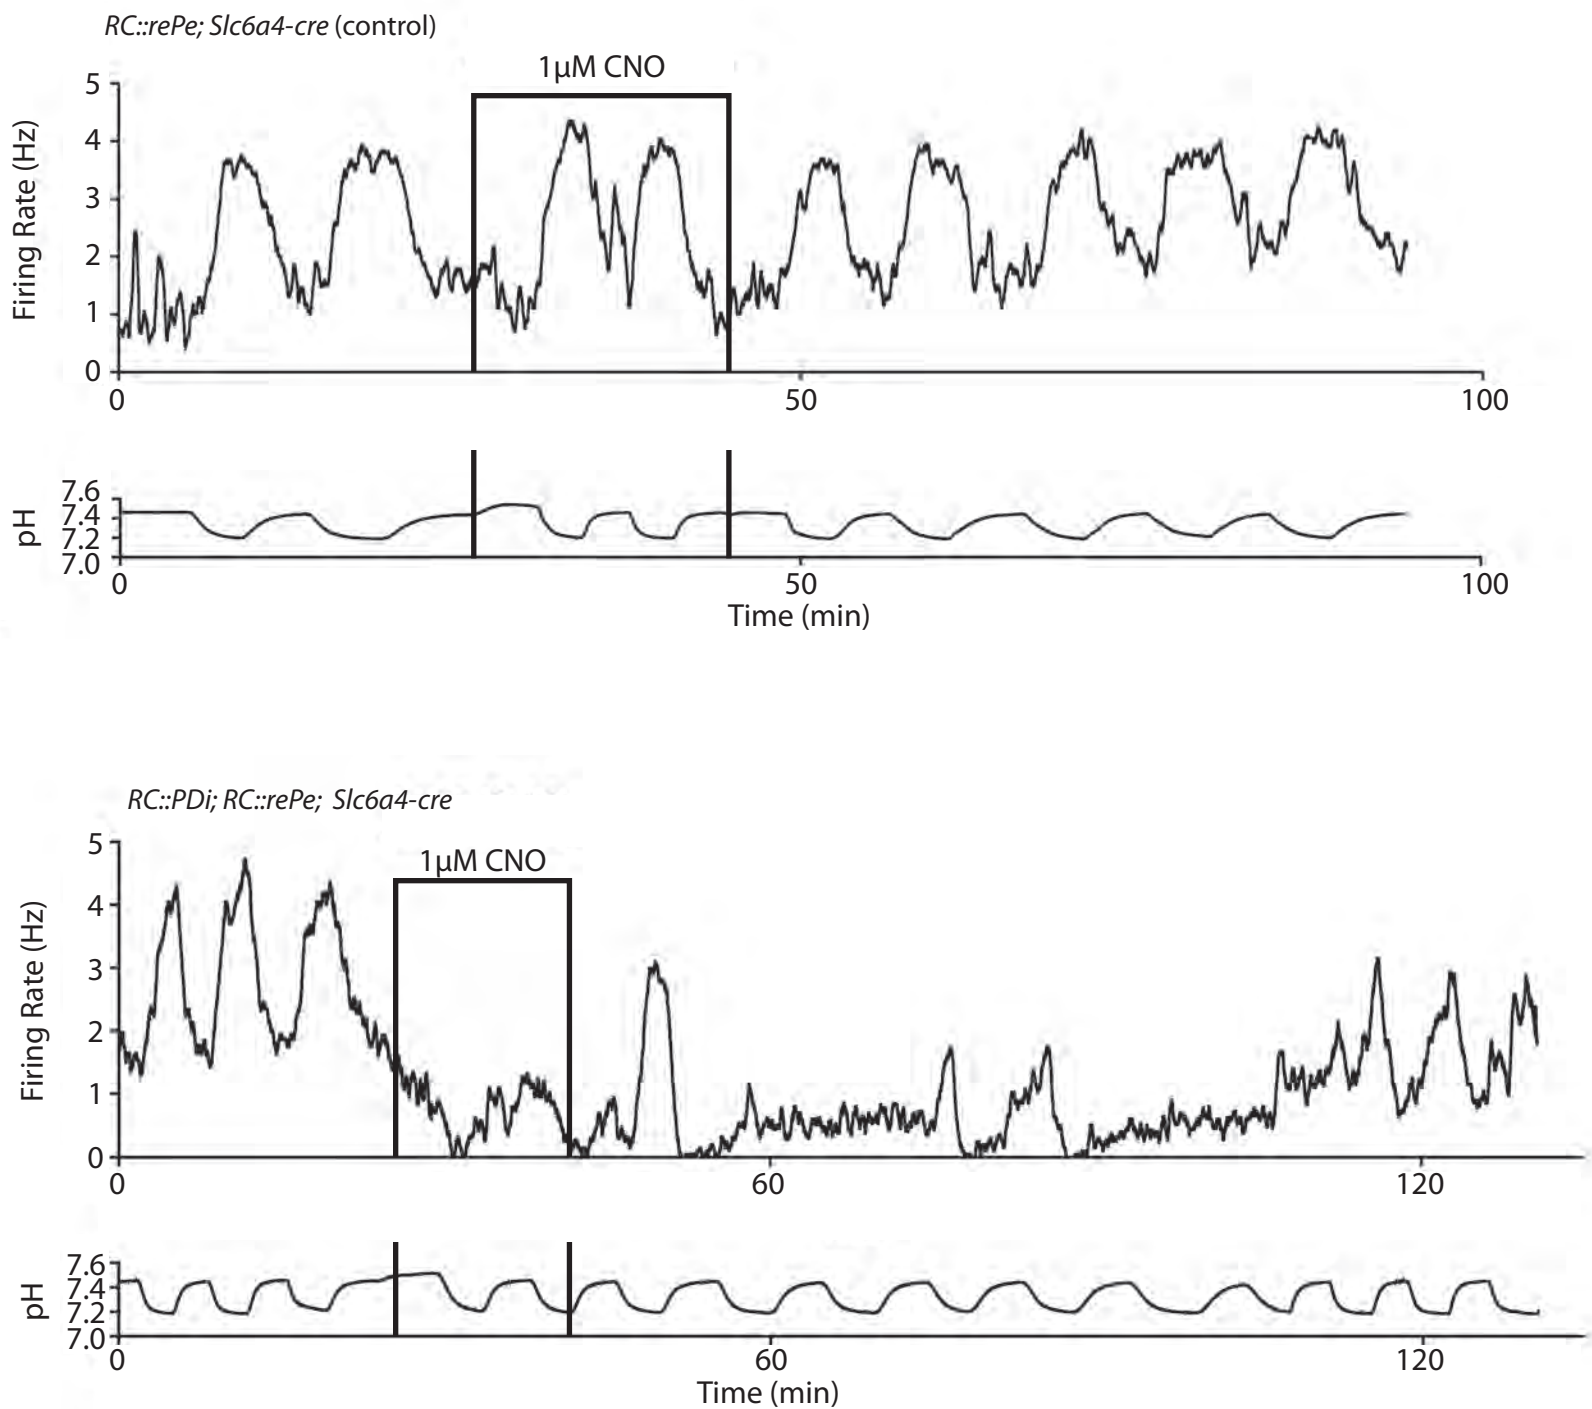

Sup. Fig. 2. Reduced firing rate response to 9% CO<sub>2</sub> in *RC::PDi; RC::rePe; Slc6a4-cre* neurons upon 1  $\mu$ M CNO application. Traces of firing rate (Hz) and simultaneous bath pH from cultured medullary serotonergic neurons from control *RC::rePe; Slc6a4-cre* mice (top) and *RC::PDi; RC::rePe; Slc6a4-cre* mice (bottom), similar to Fig. 3 (E).

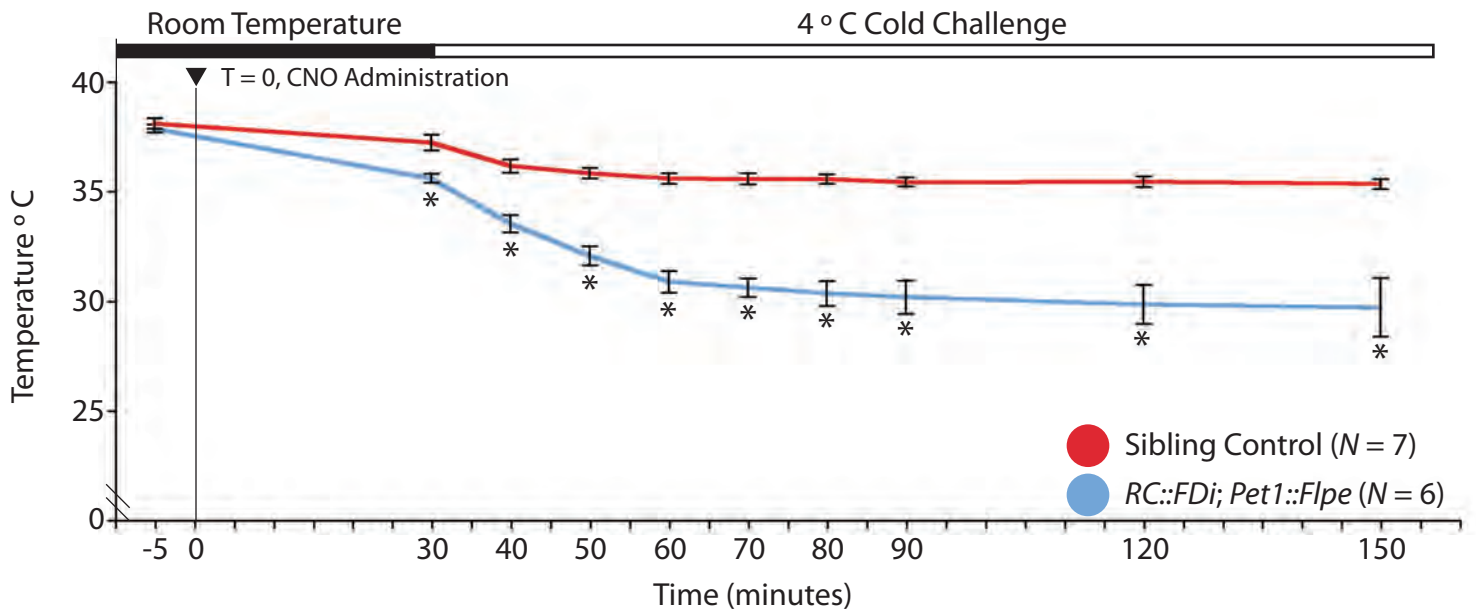

Sup. Fig. 3. CNO/Di-inhibition of *Pet1::Flpe*-defined serotonergic neurons results in reduced ability to thermo-regulate. Body temperature at room temperature (~23°C) was assessed 5 min before a single CNO intraperitoneal injection (10 mg/kg) and then again after 30 min. Mice were then subject to ambient conditions of 4°C with body temperature measurements taken every 10 min for the next hour and then every 30 min. *RC::FDi; Pet1::Flpe* male mice showed an inability to regulate body temperature as compared to control siblings, \* $p < 0.01$  (unpaired t-test).

A

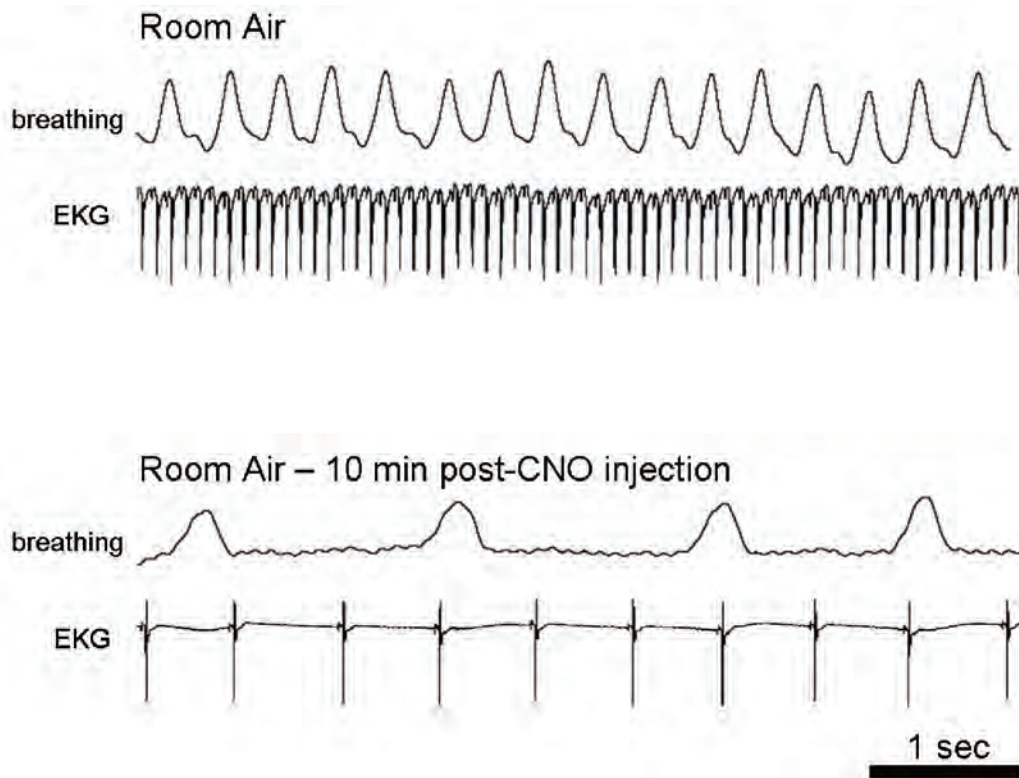

B

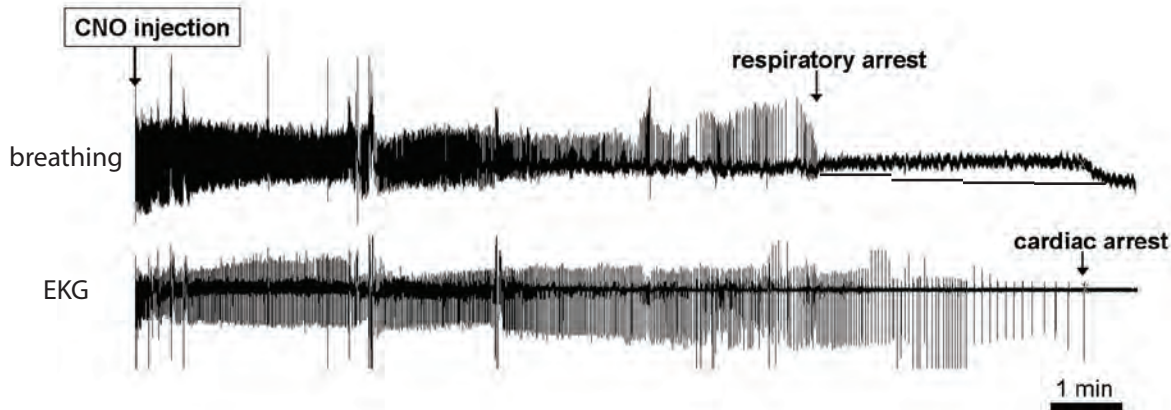

Sup. Fig. 4. Broad constitutive *Di* expression is compatible with development and triggers respiratory and cardiac arrest upon CNO injection. (A) Example trace showing that pre-CNO, *RC::Di* adult mice have normal respiratory and heart rates (53) ( $154 \pm 15$  (SEM) breaths/min and  $478 \pm 57$  (SEM) beats/min; animals analyzed = 4) that depress severely ( $55 \pm 11$  breaths/min,  $70 \pm 15$  beats/min) within 10 min of CNO injection (10mg/kg i.p.). (B) An example full respiratory and heart rate trace showing heart rate reduction within 30 s of CNO injection, with cardiac arrest occurring within 20 minutes (4 minutes after respiratory arrest).
